# Supplementary material
Source: publisher site journal article supplement (https://www.dovepress.com/article/312604)
Supplement: Supplementary file 1 [file get_supplementary_file.php]

**Figure S1. Correlation analysis of DTYMK and immune-related molecules**

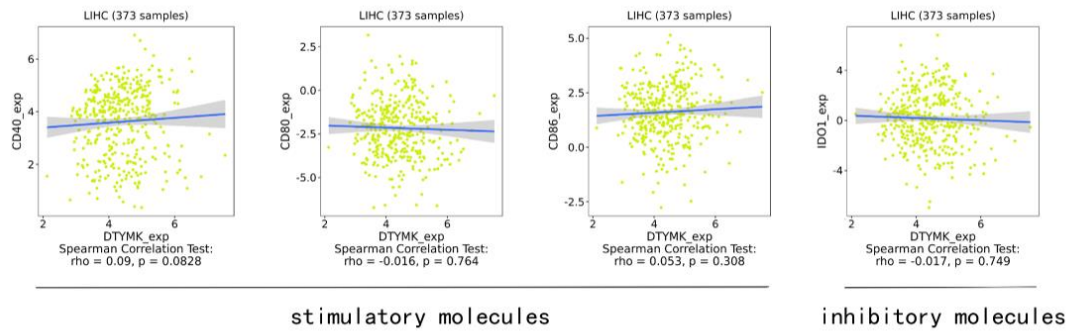

**Figure S2. Not differential chemotherapeutic response between high and low DTYMK expression group**

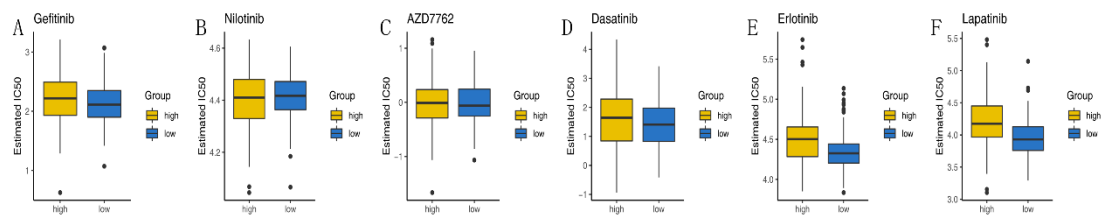

**Table S1. 18 chemo drugs were selected to be evaluated chemotherapeutic response**

| Drug name    | p value     | significance |
|--------------|-------------|--------------|
| Camptothecin | 1.13E-16    | ***          |
| Vinblastine  | 1.91E-12    | ***          |
| Cisplatin    | 1.85E-10    | ***          |
| Cytarabine   | 4.41E-09    | ***          |
| Docetaxel    | 1.64E-13    | ***          |
| Gefitinib    | 0.952661533 |              |
| Vorinostat   | 1.05E-12    | ***          |
| Nilotinib    | 0.103516931 |              |
| AZD7762      | 0.511723097 |              |
| Dasatinib    | 0.956282347 |              |
| Paclitaxel   | 9.93E-18    | ***          |
| Rapamycin    | 5.31E-19    | ***          |
| Sorafenib    | 7.62E-06    | ***          |
| Erlotinib    | 0.999999999 |              |
| Gemcitabine  | 1.34E-11    | ***          |
| Bortezomib   | 4.05E-07    | ***          |
| Lapatinib    | 1           |              |
| Vinorelbine  | 0.005800978 | **           |

The symbols \*\* and \*\*\* represent  $p < 0.01$  and  $p < 0.001$ , respectively.
